# Supplementary material for: Smartphone-Based Whole-Cell Biosensor Platform Utilizing an Immobilization Approach on a Filter Membrane Disk for the Monitoring of Water Toxicants
Source: PubMed Central journal article supplement (PMC7582319; doi:10.3390/s20195486), 2020-09-25
Supplement: sensors-20-05486-s001.pdf [file sensors-20-05486-s001.pdf]

# Python script for the analysis of CMOS-generated data

## (1) Data input and temperature reading extraction

```
import os

import pandas as pd

import numpy as np

import cv2

import matplotlib.pyplot as plt

# change of working directory to the place where the data file is.
os.chdir(r"C:\Users\CMOS ")

# read the data file using PandaFrame
df=pd.read_csv(r"CMOS-data.txt",header=None,names=range(13),sep='\s+')

# get the index of "temp"
t_index=[]

for i in range(len(df)):
    if df[0][i]=="Temp":
        t_index.append(i)

# get the temperature readout for each measurement
tem=[]

for j in range(len(t_index)):
    tem.append(df[2][t_index[j]])
    tem[j]=float(tem[j])

# cleaning the data by removing unwanted null value and transform the datatype
df.dropna(inplace=True)
df.drop(12,axis=1,inplace=True)
df.reset_index(drop=True,inplace=True)
df=df.astype(np.float)

(2) Data extraction for each channel
#get the data for each channel
a=df.to_numpy().flatten() # get the flattened numpy.array
b=np.split(a,len(a)/(12*12)) ## split the flattened array into equal number of sub-arrays (for each channel)
c1=np.array(b[0:len(b):4]) #all the reading from channel 1
```

```

c1=np.delete(c1,81,axis=0)
c2=np.array(b[1:len(b):4]) #all the reading from channel 2
c2=np.delete(c2,81,axis=0)
c3=np.array(b[2:len(b):4]) #all the reading from channel 3
c3=np.delete(c3,81,axis=0)
c4=np.array(b[3:len(b):4]) #all the reading from channel 4
c4=np.delete(c4,81,axis=0)
c1_b=np.zeros_like(c1) #Initialize a empty numpy array for channel_1_background signal
c2_b=np.zeros_like(c2) #Initialize a empty numpy array for channel_2_background signal
c3_b=np.zeros_like(c3) #Initialize a empty numpy array for channel_3_background signal
c4_b=np.zeros_like(c4) #Initialize a empty numpy array for channel_4_background signal
(3) Calculation of background signal reading according to the standard curve
#Calculate the background signal for each channel using the standard curve according to
temperature
for i in range (len(tem)):
    c1_b[i]=c1_b[i]+(2**(0.082*tem[i]+6.6341))
    c2_b[i]=c2_b[i]+(2**(0.0747*tem[i]+7.07))
    c3_b[i]=c3_b[i]+(2**(0.0681*tem[i]+7.2837))
    c4_b[i]=c4_b[i]+(2**(0.0668*tem[i]+7.4708))
(4) Calibration of bacterial signal by subtraction of calculated background
signal
#Calibrate signal by subtracting the background signal
c1=c1-c1_b
c2=c2-c2_b
c3=c3-c3_b
c4=c4-c4_b
# Normalize the image, to spread the pixel intensities from 0 to 255
c1_normalized = cv2.normalize(c1, None, 0, 255, cv2.NORM_MINMAX)
c2_normalized = cv2.normalize(c2, None, 0, 255, cv2.NORM_MINMAX)
c3_normalized = cv2.normalize(c3, None, 0, 255, cv2.NORM_MINMAX)
c4_normalized = cv2.normalize(c4, None, 0, 255, cv2.NORM_MINMAX)

```

## **(5) Computation of the induction factor**

**#Locate the number of images for the peak signal**

```
induction_factor=[]  
  
for i in range (len(c1)):  
  
induction_factor.append(((c4_normalized[i].mean()+c3_normalized[i].mean())/(c2_normalized  
[i].mean()+c1_normalized[i].mean()))  
  
peak_signal_number=induction_factor.index(max(induction_factor))
```

**# Calculate the peak signal for each channel**

```
peak_signal_c1=c1_normalized[peak_signal_number].mean()  
peak_signal_c2=c2_normalized[peak_signal_number].mean()  
peak_signal_c3=c3_normalized[peak_signal_number].mean()  
peak_signal_c4=c4_normalized[peak_signal_number].mean()
```

**# Calculate the induction factor**

```
induction_factor1=peak_signal_c3/peak_signal_c1  
induction_factor2=peak_signal_c4/peak_signal_c2
```

## **(6) Reconstruction of the output images**

**# To reconstruct the images**

```
plt.figure(figsize=(8,8))  
  
plt.subplot(221)  
  
plt.imshow(c1_normalized[peak_signal_number].reshape((12,12)),vmin=50,vmax=220, cmap  
= 'gray', interpolation='nearest' )  
  
plt.title('Channel 1: control', y=1.02, fontsize=12)  
  
plt.subplot(222)  
  
plt.imshow(c2_normalized[peak_signal_number].reshape((12,12)),vmin=50,vmax=220,  
cmap = 'gray', interpolation='nearest')  
  
plt.title('Channel 2: control', y=1.02, fontsize=12)  
  
plt.subplot(223)  
  
plt.imshow(c3_normalized[peak_signal_number].reshape((12,12)),vmin=50,vmax=220,  
cmap = 'gray', interpolation='nearest')  
  
plt.title('Channel 3: 2% ethanol ', y=1.02, fontsize=12)  
  
plt.subplot(224)  
  
plt.imshow(c4_normalized[peak_signal_number].reshape((12,12)),vmin=50,vmax=220,  
cmap = 'gray', interpolation='nearest')
```

```
plt.title('Channel 4: 2% ethanol ', y=1.02, fontsize=12)  
plt.savefig("CMOS.tif", dpi=600)
```

## Python script for stacking of smartphone-generated images

```
import os

import numpy as np

import matplotlib.pyplot as plt

import cv2

# read the images

folder=r"C:\Users\camera"

os.chdir(folder)

files=list([os.path.join(folder, f) for f in os.listdir(folder)])

new_files=[]

for i in range(len(files)):

    if (files[i].endswith(".jpg")):

        new_files.append(files[i])

# stacking the images by computing the average

average = cv2.imread(new_files[0]).astype(np.float)

for i in range(len(new_files)):

    average+=cv2.imread(new_files[i]).astype(np.float)

average=average/len(new_files)

# Normalize the image, to spread the pixel intensities from 0 to 255

# This will brighten the image without losing information

Stacked_image = cv2.normalize(average, None, 0, 255, cv2.NORM_MINMAX)

cv2.imwrite('stacked_image.png', Stacked_image)

plt.show()
```
